# Supplementary material
Source: publisher site journal article supplement (https://www.dovepress.com/article/435984)
Supplement: Supplementary file 1 [file get_supplementary_file.php]

Definition of several CT signs:

Tree-in-bud (TIB): TIB was defined as centrilobular-distributed nodules showing clusters of nodules around prominent airways in branching pattern [1].

Consolidation: Consolidation was defined as a homogeneous increase in pulmonary parenchymal attenuation that obscures the margins of vessels and airway walls[2].

Emphysema: emphysema was defined as Goddard score ≥ 1 based on low attenuation area (LAA) < − 950 HU, (LAA<-950) [3]. (The Goddard Scoring System [3]: 0, normal; 1, LAA<-950 ≤ 25% affected; 2, > 25% and ≤ 50% affected; 3, > 50% and ≤ 75% affected; and 4, > 75% affected. Goddard score was determined as the average value scored by the pulmonologists.Total Goddard score ≥ 1 was defined as emphysema.)

Enlarged mediastinal lymph nodes: Enlarged mediastinal lymph nodes were defined as having a short-axis diameter of greater than 1 cm on the CT scans [2].

Pleural effusion: Pleural effusion included unilateral and/ or bilateral pleural effusion.

Bronchiectasis: The morphologic criteria on thin-section CT scans inclued bronchial dilatation with respect to the accompanying pulmonary artery (signet ring sign), lack of tapering of bronchi, and identification of bronchi within 1 cm of the pleural surface [2].

[1] Sharma A, Sheoran A. 'Tree-in-bud' appearance in pulmonary tuberculosis [published online ahead of print, 2023 Jan 24]. QJM. 2023;hcad013. doi:10.1093/qjmed/hcad013.

[2] Hansell DM, Bankier AA, MacMahon H, McLoud TC, Müller NL, Remy J. Fleischner Society: glossary of terms for thoracic imaging. Radiology. 2008;246(3):697-722. doi:10.1148/radiol.2462070712.

[3] Takasaka N, Seki Y, Fujisaki I, et al. Impact of emphysema on sputum culture conversion in male patients with pulmonary tuberculosis: a retrospective analysis. BMC Pulm Med. 2020;20(1):287. Published 2020 Nov 7. doi:10.1186/s12890-020-01325-1.
